# Supplementary material for: Absolute gravity measurements at Brest (France) between 1998 and 2022
Source: Copernicus journal article supplement (doi:10.5194/essd-2025-211), 2025-05-13
Supplement: Supplementary file 1 [file essd-2025-211-supplement.zip]

## Sheet: metadata
	Marker	Ref01
	Latitude (ITRF):	48.4093	decimal degrees
	Longitude (ITRF):	-4.50757	decimal degrees
	Altitude (NGF-IGN69):	47.7	m
	Gradient:	-2.776	ugal/cm	0.018	ugal/cm
	Earth Tide:	ETGTAB
	Potential:	ETCPOT.dat
	Ocean Loading:	Observed (CG3M for one year between 2003 and 2004)
	Latitude:	48.4093
	Longitude:	-4.50757
	Marker	Ref02 (since 2018)
	Latitude (ITRF):	48.4093	decimal degrees
	Longitude (ITRF):	-4.50753	decimal degrees
	Altitude (NGF-IGN69):	47.71	m
	Gradient:	-2.727	ugal/cm	0.022	ugal/cm
	Earth Tide:	ETGTAB
	Potential:	ETCPOT.dat
	Ocean Loading:	Observed (CG3M for one year between 2003 and 2004)
	Latitude:	48.4093
	Longitude:	-4.50753
	Reference height:	122	cm	above Ref01 marker
	Tie between Ref01 and Ref02:	6.61	ugal
	Tie uncertainty	2.01	ugal

## Sheet: data
	file	FG5 Nr	date	nb sets	nb drops / set	g (ugal)	height (cm)	set scatter	err stat	err sys	err tot	elevation (m)	gradient (ugal/cm)	err gradient (ugal/cm)	h finale (cm)	g reduite (ugal)	err g reduite (ugal)	tie (ugal)	err tie (ugal)	g ref01 - 980 929 000 (ugal)	err g ref01 (ugal)
	sh98087	206	1998-03-29	175	25	9.80929e+08	131.29	2.01	0.151942	2.45	2.45471	47.7	-2.776	0.018	122	9.80929e+08	2.4604	6.61	2.01	203.169	2.4604
	sh99300	206	1999-10-27	87	49	9.80929e+08	131.63	2.97	0.318417	2.45	2.47061	47.7	-2.776	0.018	122	9.80929e+08	2.47668	6.61	2.01	204.053	2.47668
	sh01177	206	2001-06-28	58	100	9.80929e+08	131.28	1.36	0.178577	2.45	2.4565	47.7	-2.776	0.018	122	9.80929e+08	2.46217	6.61	2.01	208.061	2.46217
	shom_02238	206	2002-05-12	34	100	9.80929e+08	130.5	8.06	1.38228	2.45	2.81304	47.7	-2.776	0.018	122	9.80929e+08	2.8172	6.61	2.01	194.246	2.8172
	shom_04027	206	2004-01-28	48	100	9.80929e+08	130.8	1.12	0.161658	2.45	2.45533	47.7	-2.776	0.018	122	9.80929e+08	2.46043	6.61	2.01	203.219	2.46043
	sh05018b	206	2005-01-20	44	100	9.80929e+08	131.45	2	0.301511	2.45	2.46848	47.7	-2.776	0.018	122	9.80929e+08	2.47434	6.61	2.01	200.823	2.47434
	sh05270	206	2005-09-28	40	100	9.80929e+08	131.7	1.63	0.257726	2.45	2.46352	47.7	-2.776	0.018	122	9.80929e+08	2.4697	6.61	2.01	202.267	2.4697
	shom_06135a	228	2006-05-16	22	100	9.80929e+08	129.73	1.73	0.368837	2.45	2.47761	47.7	-2.776	0.018	122	9.80929e+08	2.48151	6.61	2.01	202.468	2.48151
	shom 07211a	228	2007-08-01	188	100	9.80929e+08	129.95	1.34	0.0977295	2.45	2.45195	47.7	-2.776	0.018	122	9.80929e+08	2.45612	6.61	2.01	203.719	2.45612
	shom 08168a	228	2008-06-17	47	100	9.80929e+08	129.9	1.85	0.26985	2.45	2.46482	47.7	-2.776	0.018	122	9.80929e+08	2.46891	6.61	2.01	206.25	2.46891
	shom 10202a	228	2010-07-23	116	100	9.80929e+08	129.9	2.17	0.201479	2.45	2.45827	47.7	-2.776	0.018	122	9.80929e+08	2.46238	6.61	2.01	201.13	2.46238
	shom 11159a	228	2011-06-09	24	100	9.80929e+08	129.9	1.19	0.242908	2.45	2.46201	47.7	-2.776	0.018	122	9.80929e+08	2.46612	6.61	2.01	201.82	2.46612
	shom_12109	206	2012-04-19	21	100	9.80929e+08	131.25	2.02	0.4408	2.45	2.48934	47.7	-2.776	0.018	122	9.80929e+08	2.4949	6.61	2.01	202.768	2.4949
	shom 13121a	228	2013-05-02	48	100	9.80929e+08	129.9	1.16	0.167432	2.45	2.45571	47.7	-2.776	0.018	122	9.80929e+08	2.45983	6.61	2.01	205.18	2.45983
	sh13282	206	2013-10-09	18	100	9.80929e+08	131.25	2.18	0.513831	2.45	2.5033	47.7	-2.776	0.018	122	9.80929e+08	2.50883	6.61	2.01	200.958	2.50883
	sh15223d	228	2015-08-12	48	100	9.80929e+08	130	0.99	0.142894	2.45	2.45416	47.7	-2.776	0.018	122	9.80929e+08	2.45838	6.61	2.01	203.228	2.45838
	sh16145	206	2016-05-25	42	100	9.80929e+08	131.3	1.33	0.205223	2.45	2.45858	47.7	-2.776	0.018	122	9.80929e+08	2.46427	6.61	2.01	209.587	2.46427
	shomb18100	206	2018-04-11	41	100	9.80929e+08	130.95	1.67	0.26081	2.45	2.46384	47.71	-2.727	0.022	121	9.80929e+08	2.47355	6.61	2.01	223.744	3.18725
	Shom2_19213a	228	2019-08-01	23	100	9.80929e+08	129.7	0.81	0.168897	2.45	2.45581	47.71	-2.727	0.022	121	9.80929e+08	2.46326	6.61	2.01	214.375	3.17927
	Shom2_22209a	228	2022-07-28	24	100	9.80929e+08	129.75	1.53	0.31231	2.45	2.46983	47.71	-2.727	0.022	121	9.80929e+08	2.47732	6.61	2.01	211.511	3.19017
